RESEARCH ARTICLE

# Interactions of sclerostin with FGF23, soluble klotho and vitamin D in renal transplantation

Lida Tartaglione<sup>1</sup>✉, Marzia Pasquali<sup>2</sup>✉, Silverio Rotondi<sup>1</sup>, Maria Luisa Muci<sup>1</sup>,  
Cristiana Leonangeli<sup>1</sup>, Alessio Farcomeni<sup>3</sup>, Valeria Fassino<sup>4</sup>, Sandro Mazzaferro<sup>1\*</sup>

**1** Department of Cardiovascular, Respiratory, Nephrologic, Anesthesiologic and Geriatric Sciences, Sapienza University of Rome, Italy, **2** Department of Nephrology and Dialysis, University Hospital Company, Policlinico Umberto I, Rome, Italy, **3** Department of Public Health and Infectious Diseases, Sapienza University of Rome, Italy, **4** Department of Internal Medicine and medical Specialties, University Hospital Company, Policlinico Umberto I, Rome, Italy

✉ These authors contributed equally to this work.

\* [sandro.mazzaferro@uniroma1.it](mailto:sandro.mazzaferro@uniroma1.it)

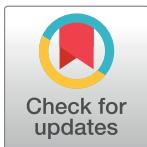

## Abstract

Relationships of Sclerostin, a bone anti-anabolic protein, with biomarkers of mineral bone disorders in chronic kidney disease are still unsettled, in particular in kidney transplant (KTR). In 80 KTR patients (31F/49M, 54.7±10.3 years) we studied the relationships of serum Sclerostin with eGFR, Calcium, Phosphate, Alkaline Phosphatase (AP), intact Parathyroid hormone (iPTH), soluble alpha-Klotho (sKlotho), intact Fibroblast Growth Factor 23 (iFGF23), 25-hydroxyvitamin D(25D) and 1,25-dihydroxyvitamin D (1,25D). Thirty healthy subjects (35.0±12.4 years, eGFR 109.1±14.1 ml/min/1.73m<sup>2</sup>) served as control for Sclerostin, iFGF23 and sKlotho. With a median eGFR of 46.3 mL/min/1.73m<sup>2</sup> (IQR, 36.2–58.3) our KTR had median Sclerostin levels of 23.7 pmol/L (IQR: 20.8–32.8), not different from controls (26.6 pmol/L, IQR: 22.0–32.2; p = n.s). Sclerostin correlated negatively with AP (r = -.251; p = 0.023) and positively with iFGF23 (r = .227; p = 0.017) and 25D (r = .214; p = 0.025). Age-adjusted multiple regression analysis identified AP and 1,25D as negative and 25D and sKlotho as positive best predictors of Sclerostin. No correlation was evident with eGFR. The negative correlation with AP confirms the direct anti-anabolic role of Sclerostin. The associations either negative or positive with iFGF23, sKlotho, and vitamin D metabolites suggest also a modulatory role in mineral homeostasis. In particular, the associations with iFGF23 (positive) and 1,25D (negative) underline the relevant inhibitory action of Sclerostin on vitamin D activation. In conclusion, Sclerostin levels in KTR are normal and influenced more by bone turnover than by eGFR. Its involvement with other hormones of mineral homeostasis (FGF23/Klotho and Vitamin D) is part of the sophisticated cross-talk between bone and the kidney.

## OPEN ACCESS

**Citation:** Tartaglione L, Pasquali M, Rotondi S, Muci ML, Leonangeli C, Farcomeni A, et al. (2017) Interactions of sclerostin with FGF23, soluble klotho and vitamin D in renal transplantation. PLoS ONE 12(5): e0178637. <https://doi.org/10.1371/journal.pone.0178637>

**Editor:** Abelardo I. Aguilera, Hospital Universitario de la Princesa, SPAIN

**Received:** December 30, 2016

**Accepted:** May 16, 2017

**Published:** May 30, 2017

**Copyright:** © 2017 Tartaglione et al. This is an open access article distributed under the terms of the [Creative Commons Attribution License](https://creativecommons.org/licenses/by/4.0/), which permits unrestricted use, distribution, and reproduction in any medium, provided the original author and source are credited.

**Data Availability Statement:** All relevant data are within the paper.

**Funding:** The authors received no specific funding for this work.

**Competing interests:** The authors have declared that no competing interests exist.

## Introduction

Produced by osteocytes, Sclerostin is a powerful modulator of bone modeling and remodeling and do this by inhibiting the canonical Wnt (Wingless-type mouse mammary tumor virus integration site) pathway. Wnt receptor inhibition by Sclerostin reduces osteoblastogenesis

and promotes osteoblast and osteocyte apoptosis thus exerting a powerful anti-anabolic effect. Moreover, since Sclerostin also induces RANKL synthesis and thus stimulates osteoclastogenesis, its inhibition both increases osteoblast and reduces osteoclast activity, with an overall increment of bone formation and mass [1,2] and eventual osteosclerosis [3]. Indeed, Sclerostin gene (SOST) knock-out mice and SOST inactivating mutations in humans [4,5], are both characterized by increased bone formation and sclerosis of the skeleton [6]. Recently, also indirect effects of Sclerostin on mineral metabolism are envisaged, since Sclerostin can increase the activity of Fibroblast growth Factor 23 (FGF23), a bone protein with powerful phosphate and vitamin D regulating properties [7]. Thus, Sclerostin promises to become an important element of the bone-kidney axis represented up to now by FGF23 and its kidney-produced co-receptor Klotho [8]. For these reasons, recent clinical studies aim to evaluate Sclerostin as a new biomarker of bone disease specifically in chronic kidney disease (CKD). In non-dialysis CKD, observational studies show that serum levels of Sclerostin increase along with the stages of renal failure [9,10] and correlate positively with serum FGF23 and phosphate [9,11]. Renal function reduction does not seem to affect its serum levels since also tubular excretion increases [12]. In dialysis patients (CKD-5D), Sclerostin levels are increased and similarly correlated positively with FGF23 and phosphate. Further in dialysis, negative relationships are described with parathyroid hormone (PTH), alkaline phosphatase (AP) and bone turnover [13–16]. In renal transplant patients (KTR), factors like immunosuppressive therapy, pre-existing bone lesion and/or the presence of variable degrees of reduced renal function may affect mineral and bone disorders (MBD). Thus, in these patients the diagnostic significance of Sclerostin serum levels warrants specific evaluation. The few available studies describe a return to the normal range early after transplantation [17] and, later on, the presence of a negative correlation with eGFR, PTH and 1,25-dihydroxyvitaminD [18]. However, in post-menopausal KTR females, no correlation has been found with biomarkers of bone resorption or formation [19].

Notably, the pathophysiologic links of Sclerostin with MBD in CKD have been recently claimed to explain the association with vascular calcification, cardiovascular disease and mortality [14,18,20], thus further increasing the clinical interest for this new biomarker.

Since clinical data in KTR are still limited, we considered useful to evaluate the relationship of Sclerostin serum levels with renal function and the hormonal systems that are potentially involved with its activity, namely FGF23/Klotho and vitamin D.

## Materials and methods

### Patients

We enrolled in a cross-sectional study, 80 renal transplant patients from our outpatient unit. Inclusion criteria were: age 18–80 years, estimated GFR (eGFR) > 15 mL/min/1.73m<sup>2</sup>, time since transplant ≥ 1 year, no evidence of acute underlying illness.

Exclusion criteria were: comorbid conditions such as cancer, liver disease or any severe systemic disease that might affect data interpretation. If any, treatment with native or active vitamin D was withheld for 3 months prior to the study. Further none of the patients required therapy with calcimimetic or phosphate binders.

Fasting blood samples were obtained for the measurement of creatinine (Cr), Calcium (Ca), Phosphate (P), total alkaline phosphatase (AP), serum collagen type 1 cross-linked C-telopeptide (CTX), intact parathyroid hormone (iPTH), 25-hydroxyvitamin D (25D), 1,25-dihydroxyvitamin D (1,25D), intact FGF23 (iFGF23), soluble alpha-Klotho (sKlotho) and Sclerostin. We also collected fasting spot urine samples from all participants at the time of blood sampling to measure creatinine, phosphate, and calcium. In each patient, we recorded clinical parameters and prescribed therapies.

Thirty healthy subjects (mean age  $35.0 \pm 12.4$  years, eGFR  $109.1 \pm 14.1$  ml/min/1.73m<sup>2</sup>) served as control to obtain local reference values for non-routinely assayed Sclerostin, sKlotho and iFGF23.

The present study is a subanalysis of the "Studio 25051954—EudraCT 2010-021041-42", approved by the Ethical Committee of the Azienda Policlinico Umberto I, and was performed in accordance with the declaration of Helsinki. Written informed consent was obtained from all patients. None of the transplant donors were from a vulnerable population and all donors or next of kin provided written informed consent that was freely given.

## Assays

Routine blood analytes (creatinine, Ca, P and AP) were immediately assayed. Samples for non-routine assay of iPTH, Sclerostin, iFGF23, sKlotho, 25D and 1,25D were immediately frozen and stored at  $-30^{\circ}\text{C}$  until measurement.

Standard colorimetric or enzymatic techniques were kinetic alkaline picrate (creatinine), cresolphthalein-complexone (Ca), ammonium molybdate (P) and p-nitrophenylphosphate (AP). The reference range of AP values is within 80 and 270 IU/ml.

iPTH was an immunoradiometric technique (DiaSorin, Stillwater, MN, USA) based on a double antibody against the intact molecule; our normal values are within 10–55 pg/mL, with intra- and inter-assay variations of 6.5% and 9.8%, respectively.

Serum 25D was assayed with a commercial kit (DiaSorin, Stillwater, MN, USA) that included sample purification with acetonitrile followed by a <sup>125</sup>I-based radioimmunoassay. Intra- and inter-assay coefficients of variation are 10.8% and 9.4%, respectively.

Levels of 1,25D were measured with a radioimmunoassay according to the manufacturer's protocol (IDS Ltd, Bolton, UK) including a monoclonal immune-extraction, followed by quantitation with a standard <sup>125</sup>I-based radioimmunoassay. Intra- and inter-assay coefficients of variation are <12% and <14%, respectively. The normal range observed in our laboratory was between 19.5 and 67.0 pg/mL.

iFGF23 was assayed with a commercially available kit (Kainos Lab. Inc. Tokyo, Japan) that utilizes a two-site ELISA for the full-length molecule. Two specific murine monoclonal antibodies recognized the biologically active FGF23, with a lower limit of detection of 3 pg/ml, and inter- and intra-assay coefficients of variation of <5%.

Serum levels of soluble alpha-Klotho were assayed with an enzyme-linked immunosorbent assay (ELISA) method that utilizes a monoclonal antibody with strong affinity for Klotho protein, recognizing with high selectivity the tertiary protein structure of its extracellular domain (Immuno-Biological Laboratories Co., Ltd.). Within- and between-run variation of the alpha-Klotho IBL was <5 and <8%, respectively.

Serum Sclerostin was a commercially available kit (Biomedica gruppe, Vienna, Austria) that utilizes a sandwich ELISA for the quantitative determination of human Sclerostin as previously reported [21]. Inter- and intra-assay variation coefficients were <10% and <7% respectively. The detection limit of the Sclerostin ELISA was 3.2 pmol/L.

Serum Collagen type 1 cross-linked C-telopeptide (CTX) was a commercially available kit (Immunodiagnostic systems, Boldon, UK) employing an ELISA test with monoclonal murine antibody specific for degradation products of C-terminal telopeptides of Type I collagen. Inter- and Intra-assay coefficients of variation were <10.9% and <3.0%.

Glomerular filtration rate (GFR) was estimated according to the Chronic Kidney Disease Epidemiology Collaboration (CKD-EPI) equation ( $\text{eGFR} = 141 \times \text{min}(\text{Scr}/\kappa, 1)^{\alpha} \times \text{max}(\text{Scr}/\kappa, 1)^{-1.209} \times 0.993^{\text{Age}} \times 1.018$  [if female]  $\times 1.159$  [if black]) [22].

## Statistical analysis

Data are expressed as mean±SD for Gaussian variables or median and IQR when normality was not tenable. We used Kolmogorov-Smirnov test to evaluate normality of continuous measurements and Pearson correlation to assess linear covariation of Gaussian measurements. Log-measurements were confirmed to be normally distributed and were used as outcomes in multivariate regression models. The final multivariate model was obtained by minimizing the Akaike information criterion via a forward stepwise regression. All tests are two tailed and (adjusted)-values <0.05 were considered as statistically significant. Analyses were performed using the open source software package R version 3.1.2.

## Results

Main clinical and biochemical data of our population of patients, which included 31 women and 49 men aged 54.7±10.3 (M±SD) years, are shown in Table 1. Median eGFR was 46.3 mL/min/1.73m<sup>2</sup> (IQR, 36.2–58.3) with CKD stages ranging within 2 and 4, while median time since transplantation was 77.6 (IQR, 37.6–119.5) months (range 12–268 months).

Median serum levels of calcium (10.1 mg/dl, IQR: 9.7–10.5), phosphate (2.9 mg/dl, IQR: 2.5–3.5), alkaline phosphatase (187.0 U/L; IQR: 139.1–221.0), CTX 0.553 ng/ml (IQR: 0.310–0.816) and iPTH (43.1 pg/ml, IQR: 25.4–70.6) were all within the normal ranges. Serum level of 1,25D (41.9 pg/ml, IQR: 30.1–53.1) averaged normal values, in front of mildly reduced 25D levels (25.1 ng/ml, IQR: 16.9–35.1). Median calcium/creatinine ratio (Ca<sub>u</sub>/Cr<sub>u</sub>) and fractional excretion of phosphate (FE PO<sub>4</sub>) were, respectively, 0,050 (IQR: 0,027–0,098 and 28.9% (IQR: 20.0–40.7).

**Table 1. Clinical and biochemical characteristics of the population under study.**

|                                          |                      |
|------------------------------------------|----------------------|
| Age (y)                                  | 55.7 (47.9–62.1)     |
| Gender (male/female)                     | 49 (61.2%)/31(38.8%) |
| B.M.I.                                   | 24.1(22.2–27.3)      |
| Time from transplantation (months)       | 77.6 (37.6–119.5)    |
| eGFR (ml/min/1.73m <sup>2</sup> )        | 46.3 (36.2–58.3)     |
| Calcium (mg/dl)                          | 10.1 (9.7–10.5)      |
| Phosphate (mg/dl)                        | 2.9 (2.5–3.5)        |
| iPTH (pg/ml)                             | 43.1(25.4–70.6)      |
| 25-hydroxyvitaminD (ng/ml)               | 25.1 (16.9–35.1)     |
| 1,25-dihydroxyvitaminD (pg/ml)           | 41.9 (30.1–53.1)     |
| Alkaline phosphatase (U/L) [NV 80–270]   | 187.0 (139.1–221.0)  |
| CTX, ng/ml                               | 0.553 (0.310–0.816)  |
| Ca <sub>u</sub> /Cr <sub>u</sub> , mg/mg | 0.050 (0.027–0.098)  |
| FE PO <sub>4</sub> , %                   | 28.9 (20.0–40.7)     |
| <b>Therapies</b>                         |                      |
| Steroids                                 | 59 (73.75%)          |
| Calcineurin inhibitors                   | 73 (91.25%)          |
| Proliferationsignalinhibitors            | 5 (6.25%)            |
| Anti-metabolite                          | 65 (81.25%)          |

Note: Data are expressed as median (interquartile range). Categorical data are presented as numbers (percentages).

Abbreviations: BMI, body mass index; eGFR, estimated glomerular filtration rate; iPTH, intact parathyroid hormone; CTX, collagen type 1 cross-linked C-telopeptide; Ca<sub>u</sub>/Cr<sub>u</sub>, calcium/creatinine ratio; FE PO<sub>4</sub>, fractional excretion of phosphate.

<https://doi.org/10.1371/journal.pone.0178637.t001>

In this population, as shown in Table 2, circulating levels of Sclerostin (23.7 pmol/L, IQR: 20.8–32.8) were not significantly different from the control group (26.6 pmol/L, IQR: 22.0–32.2;  $p = n.s.$ ). Further, we analyzed Sclerostin levels according to CKD stages but did not find differences (CKD stage 2 = 24.9±11.4; CKD stage 3 = 28.8±10.2; CKD stage 4 = 25.7±9.3;  $p = .351$ ). No differences were observed between diabetic and non-diabetic patients (respectively 25.9±10.0 vs 28.2 ± 11.0;  $p = .596$ ). There was however a gender difference, with higher values in males (28.7, IQR:16.4–56.6 vs 21.7, IQR:12.7–44.7 pmol/l;  $p = 0.004$ ) (Fig 1).

Compared to the control group, serum levels of iFGF23 and sKlotho were, respectively, significantly increased (40.5, IQR: 25.0–59.0 vs 33.6, IQR: 28.1–44.2pg/ml;  $p = 0.003$ ), and significantly decreased (449.3, IQR: 387.7–533.9 vs 794.9, IQR: 619.4–900.5 pg/ml;  $p = .001$ ) (Table 2).

Correlation tests showed that Sclerostin correlated negatively with AP ( $r = -.251$ ;  $p = 0.023$ ) and positively with iFGF23 ( $r = .227$ ;  $p = 0.017$ ) and 25D ( $r = .214$ ;  $p = 0.025$ ) (Fig 2A, 2B and 2C), while no correlation was evident with age and eGFR. However, the age-adjusted multi-regression analysis identified AP and 1,25D as negative and 25-D and sKlotho as positive best predictors of Sclerostin (Table 3).

## Discussion

In our KTR population serum Sclerostin levels were not different from the control group and averaged values similar to what has been already published in healthy/general populations [21,23] or in other cohorts of long-term transplant patients [18,19]. Also, the gender difference in our patients (higher values in males) matches the available data in the general population [23] and in renal transplant patients [18] and can be explained by the larger total-body skeletal mass of men [24] and/or by the inhibitory effect of oestrogens on Sclerostin synthesis [24,25].

At variance with previous data in CKD [10] and long term KTR [17, 18], we found no correlation of Sclerostin with eGFR. Nonetheless, our results agree with the hypothesis of increased renal excretion of Sclerostin along with GRF reduction, as described in conservative CKD [10, 12]. Further, the interaction between Sclerostin and eGFR could be masked by differences in bone turnover. In fact, a negative relationship with bone turnover markers has been described both in the general population [21] and in CKD-5D [14,15]. Indeed, also in our KTR serum Sclerostin correlated negatively with AP, an association in agreement with the undisputed inhibitory role on osteoblasts activity. This anti-anabolic role is confirmed by the inverse association with bone specific alkaline phosphatase (bALP) and other markers of bone turnover in non-renal elderly women with presumably limited reduction in GFR and in patients with no residual renal function like hemodialysis patients [21,14,15]. Further, serum Sclerostin has been shown to correlate negatively with osteoblast number and histologic parameters of bone turnover in CKD-5D [13]. To our knowledge, only one paper shows no

**Table 2. Serum levels of Sclerostin, FGF23 and Klotho in our control group and renal transplant population.**

|                     | KTR                 | Control Group       | P values |
|---------------------|---------------------|---------------------|----------|
| Sclerostin (pmol/L) | 23.7 (20.8–32.8)    | 26.6 (22.0–32.2)    | 0.804    |
| iFGF23 (pg/ml)      | 40.5 (25.0–59.0)    | 33.6 (28.1–44.1)    | 0.003    |
| sKlotho (pg/ml)     | 449.3 (387.7–533.9) | 794.9 (619.4–900.5) | 0.001    |

Note: Data are expressed as median (interquartile range).

Abbreviations: KTR, renal transplant patients; iFGF23, intact Fibroblast Growth Factor 23; sKlotho, soluble alpha Klotho.

<https://doi.org/10.1371/journal.pone.0178637.t002>

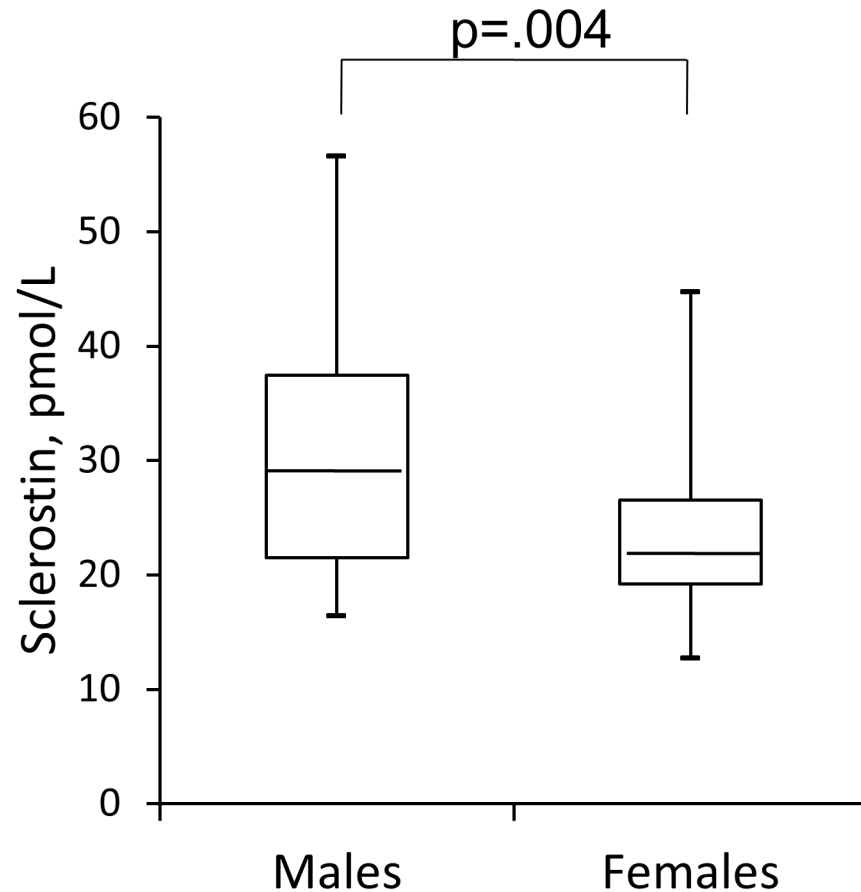

**Fig 1. Gender differences in Sclerostin serum levels in renal transplantation.** Indicated are medians, first and third quartiles, minimal and maximal values. Males versus Females  $p < .05$ .

<https://doi.org/10.1371/journal.pone.0178637.g001>

correlation of Sclerostin with bone resorption and bone formation biomarkers, but in a low number (only 19 cases) of post-menopausal KTR women. Apparently then, the absence of correlation between Sclerostin and eGFR in our study could be explained by possible clinical differences in the enrolled populations. Also, Sclerostin is suggested as a potentially useful biomarker of bone turnover, with no difference between renal and non-renal patients.

Further associations of Sclerostin in our study included the positive linear relationships with iFGF23 and 25D, and the age-adjusted multiple regression analysis indicating AP and 1,25D as negative, and 25D and sKlotho as positive best predictors of Sclerostin.

A positive correlation of Sclerostin with FGF23 has been already described in conservative renal insufficiency [10,11,16] and is confirmatory of the experimental evidence suggesting that Sclerostin increases FGF23 by inhibiting PHEX (a protein encoded by the *P*hosphate regulating gene with *H*omologies to *E*ndopeptidases on the *X* chromosome) [7]. In fact, PHEX protein stimulates FGF23 degradation [26] thus reducing its activity. By interacting with its co-receptor Klotho, FGF23 increases tubular phosphate excretion and inhibits 1,25D synthesis [27,28] with eventual well described clinical effects [8,29]. As a confirmation, Sclerostin knock-out mice have decreased FGF23 with elevated inorganic phosphate concentrations and increased 1,25D levels [26]. Clinical studies, both in pre-dialysis CKD and in dialysis patients, confirm the positive correlation between Sclerostin and FGF23 [18], and a direct correlation has been demonstrated also as bone expression, in a study involving pediatric patients with

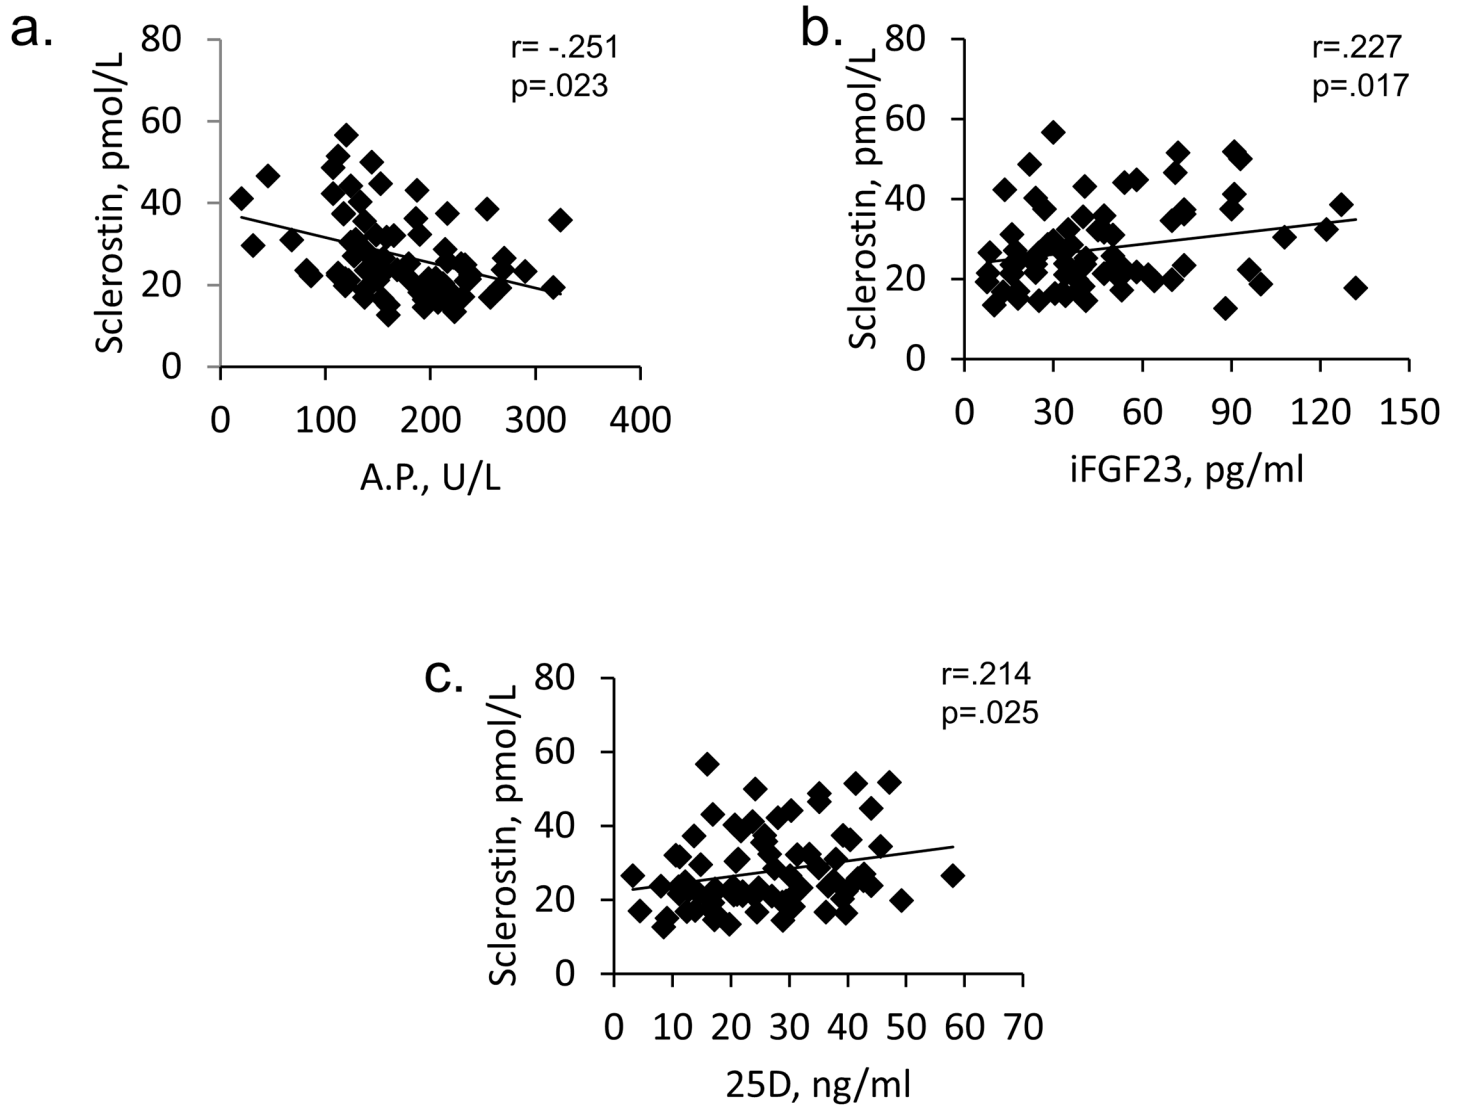

**Fig 2. Correlation tests of Sclerostin.** Correlation tests with (a) AP, Alkaline Phosphatase; (b) iFGF23, intact Fibroblast Growth Factor 23; (c) 25D, 25-hydroxyvitaminD.

<https://doi.org/10.1371/journal.pone.0178637.g002>

different types of solid organ allografts (22 patients in total, only 8 KTR) [30]. In adult KTR data are scanty and we are among the few to contemporarily assay serum levels of FGF23 and of Sclerostin. Our results are confirmatory of the physiologic regulatory role of Sclerostin on FGF23 synthesis.

**Table 3. Age adjusted multivariate analysis with Sclerostin as predicted variable.**

| VAR                    | COEF   | C.I.           | P      |
|------------------------|--------|----------------|--------|
| Alkaline Phosphatase   | -0.036 | -0.069, -0.003 | 0.0337 |
| 25-hydroxyvitaminD     | 0.218  | 0.0118, 0.424  | 0.0386 |
| 1,25-dihydroxyvitaminD | -0.182 | -0.331, -0.034 | 0.0167 |
| sKlotho                | 0.017  | 0.001, 0.032   | 0.0337 |

VAR: variable; COEF: coefficient of linear regression; CI: confidence interval; sKlotho, soluble alpha Klotho.

<https://doi.org/10.1371/journal.pone.0178637.t003>

The negative correlation between Sclerostin and 1,25D observed in our study has been already reported in long-term KTR [18] and can be explained with the down regulation of renal 1-alpha-hydroxylase by Sclerostin through direct or indirect (PHEX inhibition and FGF23 stimulation) effects [7]. On the other hand, the inconsistent association of Sclerostin with the two vitamin D metabolites (positive with 25D and negative with 1,25D) is new and needs special consideration. In fact, available clinical observations in healthy and renal patients mostly describe no relationship with 25D [10,19,23,25,30,31], however, administration of 25D increases Sclerostin levels both in healthy subjects [32] and in CKD-5D [33] while in vitro experiments show that intracellular 1,25D stimulates Sclerostin production by osteocytes [34]. Therefore, in KTR, higher circulating 25D by allowing higher intracellular 1,25D synthesis might, in turn, favor Sclerostin synthesis by osteocytes. Importantly, the eventual increment of serum Sclerostin levels will exert a negative feed-back on 1,25D synthesis, in line with current physiological concepts. Thus, the inconsistency of our data with other clinical observations should be related to differences in ethnicity or therapies, including vitamin D supplementation that is mostly not specified in the available papers [10,11,18,19] while were not prescribed or timely withheld in our patients.

To our knowledge, also the positive relationship between Sclerostin and sKlotho observed in multivariate analysis in our KTR is new. We know that sKlotho interacts with Wnt pathway by either inhibiting Wnt ligands [35] or by upregulating Wnt inhibitors [36], thus allowing to accept the present correlation, which reinforces the potential clinical significance of sKlotho in renal patients as a marker of the dialogue between bone and the kidney.

The complex interactions of Sclerostin with other divalent-ion regulating systems emerging from our results are tentatively illustrated in Fig 3. They deserve appreciation since they help describe, at least in part, the complex endocrine link existing between bone and the kidney.

As a whole, our data suggest that Sclerostin is involved not only with bone turnover, but also with the synthesis of other divalent ion regulating-hormones. Indeed, clinical observations reporting on Sclerostin correlations in different types of renal patients are incomplete and possibly inconsistent, as schematically recapitulated in Table 4. This table shows, first of all, that none of the available study contemporarily examines all the biomarkers we assayed. Second, that when present, the correlations with AP and PTH are consistently negative both in healthy and kidney patients. Third, that similarly consistent and of positive sign (when assayed and if present), are the correlations with serum phosphate and FGF23 but in renal patients only. Fourth, that the relationship with 25D (as a marker of vitamin D repletion) may vary in different clinical conditions, while the negative association with the circulating active hormone seems consistent in KTR. Importantly, this last association highlights the negative feed-back of Sclerostin, whose bone synthesis is induced by vitamin D, on 1,25D synthesis.

In any case, our results highlights the complex role for Sclerostin in CKD-MBD in KTR and indicate a significant contribution to mineral homeostasis. From a systemic point of view, this complex involvement suggests potential links even with extra-skeletal calcification processes. In fact, Sclerostin is currently regarded as a promising new player in CKD-MBD, possibly implicated with the pathomechanisms of vascular calcification and cardiovascular mortality [14,18,20].

Several limitations can be recognized in our study. First, an increased number of cases would have reinforced the reliability of our results, however, our sample size is definitely adequate to obtain convincing preliminary correlations. Second, a more precise assessment of renal function (e.g. by inulin or iohexol clearance) would have strengthen our finding of no correlation with eGFR. For the same reason if we measured urinary Sclerostin we could have confirmed its increased secretion along with eGFR reduction. Third, reliability of commercial sKlotho assays has been recently questioned [37]. However, in the present study we employed



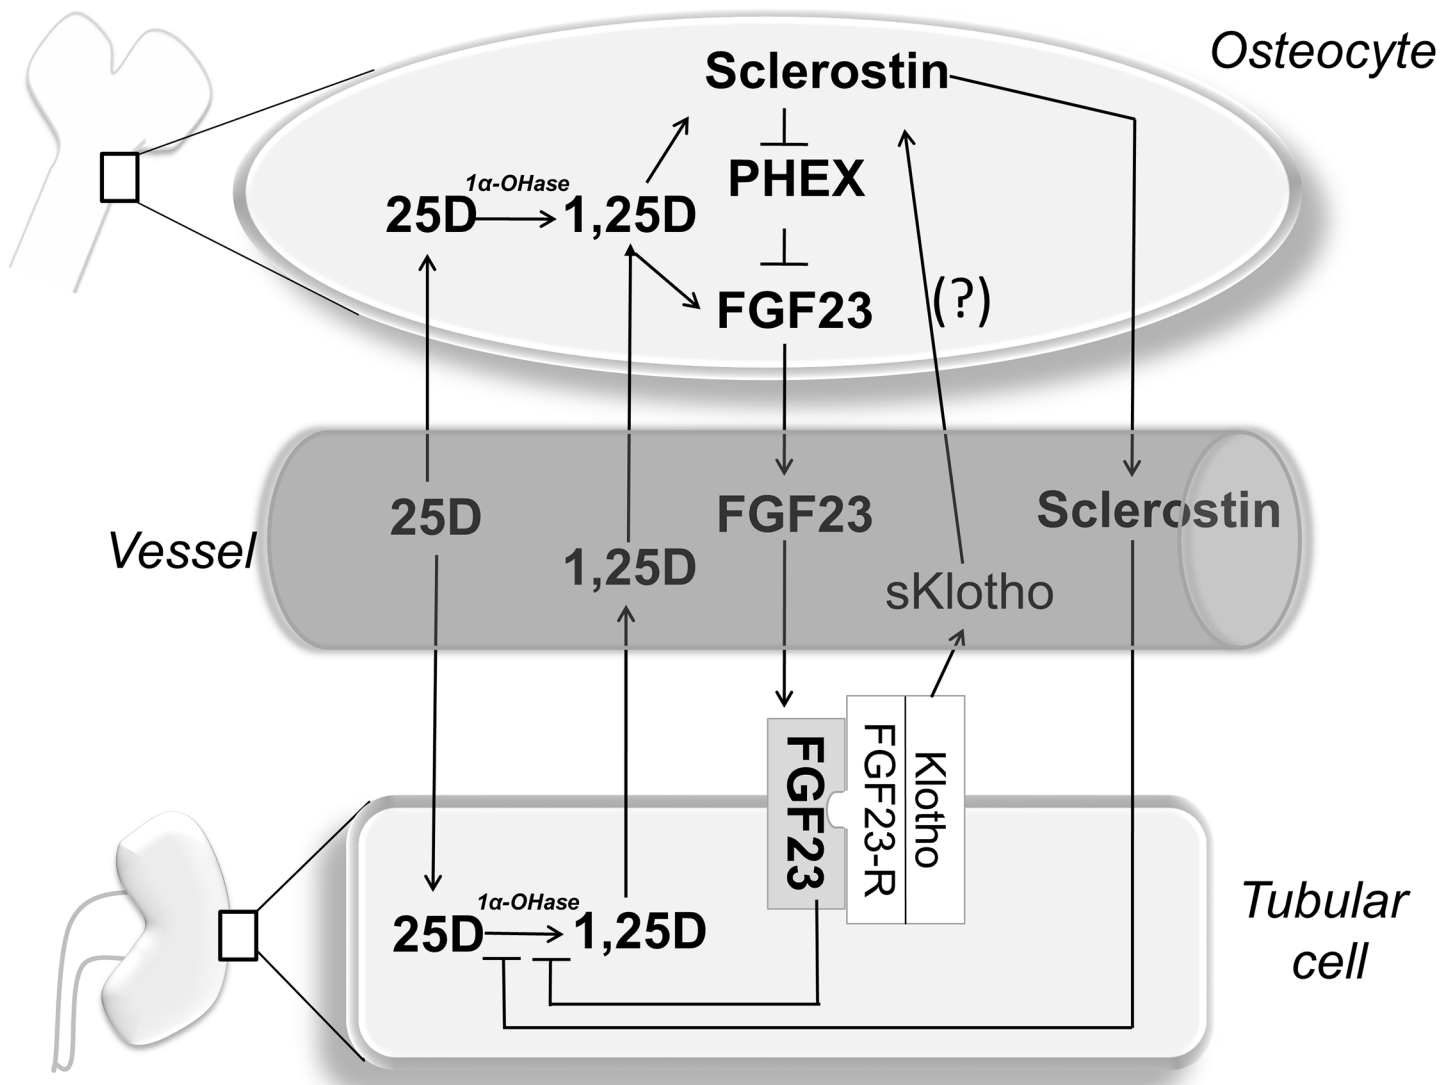

**Fig 3. Bone-kidney axis.** Schematic of the possible pathophysiologic links of Sclerostin with FGF23-Klotho and vitamin D system in kidney transplant patients. Intracellular 1,25D stimulates Sclerostin synthesis. Sclerostin, through inhibition of PHEX (an FGF23 inhibitor), indirectly increases FGF23 production. Also, Sclerostin inhibits 1,25D synthesis through direct (inhibition of renal 1-αOH-ase) and indirect (stimulation of FGF23) effects. S-Klotho could be another positive local modulator of Sclerostin synthesis. Abbreviations: PHEX, a protein encoded by the phosphate regulating gene with homologies to endopeptidases on the X chromosome; FGF23, Fibroblast growth factor 23; 1αOH-ase, 1alpha-hydroxylase; 25D, 25-hydroxyvitaminD; 1,25D, 1,25-dihydroxyvitaminD; Arrows: Stimulation; End Lines: Inhibition.

<https://doi.org/10.1371/journal.pone.0178637.g003>

the most accredited commercial method which, in our hands, evidenced early reduction since CKD stage 2 [38], in line with other published papers [39].

Strengths of our study are the contemporary assessment of a number of biomarkers and the biological plausibility of the relationships described.

### Conclusions

Serum Sclerostin levels in KTR are mostly normal and apparently influenced more by bone turnover than by GFR reduction. Sclerostin can be regarded as a novel negative biomarker of bone turnover, with complex interactions with other modulators of bone cells activity (FGF23/

**Table 4. Currently reported correlations (either linear or multivariate analysis) of serum Sclerostin levels in different clinical condition.**

| Population                           | Sample size      | Correlations |      |       |       |          |       |       |       |         |      | Ref.    |
|--------------------------------------|------------------|--------------|------|-------|-------|----------|-------|-------|-------|---------|------|---------|
|                                      |                  | eGFR         | Ca   | P     | PTH   | AP/ bALP | 25D   | 1,25D | FGF23 | sKlotho | CTX  |         |
| Healthy subjects/ General population | 161              |              | Neg* | n.s.  | n.s.  | n.s.     | n.s.  |       |       |         | n.s. | 23      |
|                                      | 40               |              | n.s. | n.s.  | Neg*^ | n.s.     | n.s.  | n.s.  |       |         | n.s. | 25      |
|                                      | 593              |              |      | n.s.  | n.s.  | Neg*     |       |       |       |         | Neg* | 21      |
| ConservativeCKD                      | 90               | Neg*^        | n.s. | Pos*^ | n.s.  | n.s.     | n.s.  | .     |       |         |      | 10      |
|                                      | 173              | Neg*         | n.s. | Pos*^ | Pos*  | n.s.     | n.s.  |       | Pos^  |         |      | 11      |
|                                      | 140 <sup>§</sup> |              | n.s. | Pos*^ | n.s.  |          | n.s.  | n.s.  | Pos*  |         |      | 16      |
| CKD-5D                               | 673              | Neg*         | Pos* | Pos*  | Neg*  | Neg*     |       |       |       |         |      | 14      |
|                                      | 181              |              | n.s. | n.s.  | n.s.  | Neg*     |       |       |       |         |      | 15      |
|                                      | 60               |              | Pos* | n.s.  | Neg*  |          |       |       |       |         |      | 13      |
| KTR                                  | 268              | Neg*^        | n.s. | n.s.  | Neg^  |          | n.s.  | Neg*^ |       |         |      | 18      |
|                                      | 31               | Neg^         | n.s. | Pos^  | n.s.  | n.s.     | n.s.  |       |       |         | n.s. | 19      |
|                                      | 80               | n.s.         | n.s. | n.s.  | n.s.  | Neg*^    | Pos*^ | Neg^  | Pos*  | Pos^    | n.s. | Our KTR |

**Abbreviations:** eGFR, estimated glomerular filtration rate; Ca, calcium; P, phosphate; PTH, parathyroid hormone; AP, alkaline phosphatase; bALP, bone alkaline phosphatase; 25D, 25-hydroxyvitaminD; 1,25D, 1,25-dihydroxyvitaminD; FGF23, Fibroblast Growth Factor 23; CKD-5D, dialysis patients; CTX, collagen type 1 cross-linked C-telopeptide; KTR, kidney transplant recipients. Empty boxes indicate absence of data.

(\*) Univariate analysis

(^) Multivariate analysis

(<sup>§</sup>) 46 patients with CKD-5D.

<https://doi.org/10.1371/journal.pone.0178637.t004>

Klotho and Vitamin D in particular). As such, its role as a new player in the field of bone-kidney axis in CKD in general and in KTR in particular, is confirmed and seems to deserve further appreciation.

### Acknowledgments

This work was presented as a poster communication at the 50<sup>th</sup> European Renal Association (ERA-EDTA) meeting, Istanbul, in May 2013 and at the 54<sup>th</sup> Italian Society of Nephrology meeting, Firenze, in September 2013.

### Author Contributions

**Conceptualization:** LT MP SM.

**Data curation:** LT SR MLM CL.

**Formal analysis:** AF.

**Investigation:** LT SR MLM CL.

**Methodology:** MP AF SM.

**Project administration:** MP SM.

**Resources:** LT MP SR MLM CL VF.

**Software:** AF.

**Supervision:** SM.

**Validation:** VF.

**Visualization:** LT MP SM.

**Writing – original draft:** LT MP SM.

**Writing – review & editing:** LT MP SM.

## References

1. Rodda SJ, McMahon AP. Distinct roles for Hedgehog and canonical Wnt signaling in specification, differentiation and maintenance of osteoblast progenitors. *Development* 2006; 133:3231–44. <https://doi.org/10.1242/dev.02480> PMID: 16854976
2. Bennett CN, Longo KA, Wright WS, Suva LJ, Lane TF, Hankenson KD, et al. Regulation of osteoblastogenesis and bone mass by Wnt10b. *Proc Natl Acad Sci U S A* 2005; 102:3324–9. <https://doi.org/10.1073/pnas.0408742102> PMID: 15728361
3. Li X, Zhang Y, Kang H, Liu W, Liu P, Zhang J, et al. Sclerostin binds to LRP5/6 and antagonizes canonical Wnt signaling. *J Biol Chem* 2005; 280:19883–7. <https://doi.org/10.1074/jbc.M413274200> PMID: 15778503
4. Hamersma H, Gardner J, Beighton P. The natural history of sclerosteosis. *Clin Genet* 2003; 63:192–7. PMID: 12694228
5. Beighton P, Barnard A, Hamersma H, van der Wouden A. The syndromic status of sclerosteosis and van Buchem disease. *Clin Genet* 1984; 25:175–81. PMID: 6323069
6. Li X, Ominsky MS, Niu Q-T, Sun N, Daugherty B, D'Agostin D, et al. Targeted deletion of the sclerostin gene in mice results in increased bone formation and bone strength. *J Bone Miner Res* 2008; 23:860–9.
7. Ryan ZC, Ketha H, McNulty MS, McGee-Lawrence M, Craig TA, Grande JP, et al. Sclerostin alters serum vitamin D metabolite and fibroblast growth factor 23 concentrations and the urinary excretion of calcium. *Proc Natl Acad Sci U S A* 2013; 110:6199–204. <https://doi.org/10.1073/pnas.1221255110> PMID: 23530237
8. Mazzaferro S, Pasquali M, Pirrò G, Rotondi S, Tartaglione L. The bone and the kidney. *Arch Biochem Biophys* 2010; 503:95–102. <https://doi.org/10.1016/j.abb.2010.06.028> PMID: 20599669
9. Cejka D, Jäger-Lansky A, Kieweg H, Weber M, Bieglmayer C, Haider DG, et al. Sclerostin serum levels correlate positively with bone mineral density and microarchitecture in haemodialysis patients. *Nephrol Dial Transplant* 2012; 27:226–30.
10. Pelletier S, Dubourg L, Carlier MC, Hadj-Aissa A, Fouque D. The relation between renal function and serum sclerostin in adult patients with CKD. *Clin J Am Soc Nephrol* 2013; 8:819–23. <https://doi.org/10.2215/CJN.07670712> PMID: 23430206
11. Kanbay M, Siritopol D, Saglam M, Kurt YG, Gok M, Cetinkaya H, et al. Serum sclerostin and adverse outcomes in nondialyzed chronic kidney disease patients. *J Clin Endocrinol Metab* 2014; 99:e1854–61. <https://doi.org/10.1210/jc.2014-2042> PMID: 25057883
12. Cejka D, Marculescu R, Kozakowski N, Plischke M, Reiter T, Gessl A, et al. Renal elimination of sclerostin increases with declining kidney function. *J Clin Endocrinol Metab* 2014; 99:248–55. <https://doi.org/10.1210/jc.2013-2786> PMID: 24187403
13. Cejka D, Herberth J, Branscum AJ, Fardo DW, Monier-Faugere MC, Diarra D, et al. Sclerostin and dickkopf-1 in renal osteodystrophy. *Clin J Am Soc Nephrol* 2011; 6:877–82. <https://doi.org/10.2215/CJN.06550810> PMID: 21164019
14. Drechsler C, Evenepoel P, Vervloet MG, Wanne C, Ketteler M, Marx N, et al. High levels of circulating sclerostin are associated with better cardiovascular survival in incident dialysis patients: Results from the NECOSAD study. *Nephrol Dial Transplant* 2015; 30:288–93. <https://doi.org/10.1093/ndt/gfu301> PMID: 25248363
15. Ishimura E, Okuno S, Ichii M, Norimine K, Yamakawa T, Shoji S, et al. Relationship between serum sclerostin, bone metabolism markers, and bone mineral density in maintenance hemodialysis patients. *J Clin Endocrinol Metab* 2014; 99:4315–20. <https://doi.org/10.1210/jc.2014-2372> PMID: 25093620
16. Desjardins L, Liabeuf S, Oliveira RB, Louvet L, Kamel S, Lemke H-D, et al. Uremic toxicity and sclerostin in chronic kidney disease patients. *Nephrol Ther* 2014; 10:463–70. <https://doi.org/10.1016/j.nephro.2014.04.002> PMID: 25070604
17. Bonani M, Rodriguez D, Fehr T, Mohebbi N, Brockmann J, Blum M, et al. Sclerostin blood levels before and after kidney transplantation. *Kidney Blood Press Res*. 2014; 39:230–9. <https://doi.org/10.1159/000355781> PMID: 25118597
18. Evenepoel P, Goffin E, Meijers B, Kanaan N, Bammens B, Coche E, et al. Sclerostin serum levels and vascular calcification progression in prevalent renal transplant recipients. *J Clin Endocrinol Metab* 2015; 100:4669–76. <https://doi.org/10.1210/jc.2015-3056> PMID: 26505822

19. Tomei P, Zaza G, Granata S, Gatti D, Fraccarollo C, Gesualdo L, et al. Sclerostin and dickkopf-1 in post-menopausal renal allograft recipients. *Transplant Proc* 2014; 46:2241–6. <https://doi.org/10.1016/j.transproceed.2014.07.024> PMID: 25242761
20. Brandenburg VM, Kramann R, Koos R, Krüger T, Schurgers L, Mühlenbruch G, et al. Relationship between sclerostin and cardiovascular calcification in hemodialysis patients: a cross-sectional study. *BMC Nephrol* 2013; 14:219. <https://doi.org/10.1186/1471-2369-14-219> PMID: 24112318
21. Mödder UI, Hoey KA, Amin S, McCreedy LK, Achenbach SJ, Riggs BL, et al. Relation of age, gender, and bone mass to circulating sclerostin levels in women and men. *J Bone Miner Res* 2011; 26:373–9. <https://doi.org/10.1002/jbmr.217> PMID: 20721932
22. Levey AS, Stevens LA, Schmid CH et al. A new equation to estimate glomerular filtration rate. *Ann Intern Med* 2009; 150:604–612 PMID: 19414839
23. Amrein K, Amrein S, Drexler C, Dimai HP, Dobnig H, Pfeifer K, et al. Sclerostin and its association with physical activity, age, gender, body composition, and bone mineral content in healthy adults. *J Clin Endocrinol Metab* 2012; 97:148–54. <https://doi.org/10.1210/jc.2011-2152> PMID: 21994959
24. Mödder U II, Clowes JA, Hoey K, Peterson JM, McCreedy L, Oursler MJ, et al. Regulation of circulating sclerostin levels by sex steroids in women and in men. *J Bone Miner Res* 2011; 26:27–34. <https://doi.org/10.1002/jbmr.128> PMID: 20499362
25. Mirza FS, Padhi ID, Raisz LG, Lorenzo JA. Serum sclerostin levels negatively correlate with parathyroid hormone levels and free estrogen index in postmenopausal women. *J Clin Endocrinol Metab* 2010; 95:1991–7. <https://doi.org/10.1210/jc.2009-2283> PMID: 20156921
26. Bowe AE, Finnegan R, Jan de Beur SM, Cho J, Levine MA, Kumar R, et al. FGF-23 inhibits renal tubular phosphate transport and is a PHEX substrate. *Biochem Biophys Res Commun* 2001; 284:977–81. <https://doi.org/10.1006/bbrc.2001.5084> PMID: 11409890
27. Liu S. Fibroblast Growth Factor 23 Is a Counter-Regulatory Phosphaturic Hormone for Vitamin D. *J Am Soc Nephrol* 2006; 17:1305–15. <https://doi.org/10.1681/ASN.2005111185> PMID: 16597685
28. Liu S, Zhou J, Tang W, Jiang X, Rowe DW, Quarles DL. Pathogenic role of Fgf23 in Hyp mice. *Am J Physiol Endocrinol Metab* 2006; 291:E38–49. <https://doi.org/10.1152/ajpendo.00008.2006> PMID: 16449303
29. Cozzolino M, Mazzaferro S. The fibroblast growth factor 23: a new player in the field of cardiovascular, bone and renal disease. *Curr Vasc Pharmacol* 2010; 8:404–11. PMID: 20180772
30. Pereira RC, Valta H, Tumber N, Salusky IB, Jalanko H, Mäkitie O, et al. Altered osteocyte-specific protein expression in bone after childhood solid organ transplantation. *PLoS One*, 2015; 10:1–12.
31. Kanbay M, Siripol D, Saglam M, Kurt YG, Gok M, Cetinkaya H, et al. Serum sclerostin and adverse outcomes in nondialyzed chronic kidney disease patients. *J Clin Endocrinol Metab* 2014; 99:E1854–61. <https://doi.org/10.1210/jc.2014-2042> PMID: 25057883
32. Sankaralingam A, Roplekar R, Turner C, Dalton RN, Hampson G. Changes in dickkopf-1 (DKK1) and sclerostin following a loading dose of vitamin D2 (300,000 IU). *J Osteoporos* 2014; 2014:682763. <https://doi.org/10.1155/2014/682763> PMID: 25548714
33. Pereira RC, Jüppner H, Gales B, Salusky IB, Wesseling-Perry K. Osteocytic protein expression response to doxercalciferol therapy in pediatric dialysis patients. *PLoS One* 2015; 10:1–18.
34. Severson B, Taylor S, Pan Y. Cbfa1/RUNX2 Directs Specific Expression of the Sclerosteosis Gene (SOST). *J Biol Chem* 2004; 279:13849–58. <https://doi.org/10.1074/jbc.M306249200> PMID: 14739291
35. Liu H, Fergusson M, Castilho R et al. Augmented Wnt signaling in a mammalian model of accelerated aging. *Science* 2007; 317:803–6. <https://doi.org/10.1126/science.1143578> PMID: 17690294
36. Carrillo-Lopez N, Panizo S, Alonso-montes C, Roma P, Dusso AS, Naves M, et al. Direct inhibition of osteoblastic Wnt pathway by fibroblast growth factor 23 contributes to bone loss in chronic kidney disease. *Kidney Int* 2016; 90:77–89. <https://doi.org/10.1016/j.kint.2016.01.024> PMID: 27165819
37. Hoenderop J, Borst MH De. Laboratory aspects of circulating  $\alpha$ -Klotho. *Nephrol Dial Transplant* 2013; 28:2283–2287. <https://doi.org/10.1093/ndt/gft236> PMID: 23787542
38. Rotondi S, Pasquali M, Tartaglione L, Muci ML, Mandanici G, Leonangeli C, et al. Soluble  $\alpha$ -Klotho Serum Levels in Chronic Kidney Disease. *Int J Endocrinol* 2015; 2015:1–8.
39. Pavik I, Jaeger P, Ebner L, Wagner CA, Petzold K, Spichtig D, et al. Secreted Klotho and FGF23 in chronic kidney disease Stage 1 to 5: a sequence suggested from a cross-sectional study. *Nephrol Dial Transplant* 2013; 28:352–9. <https://doi.org/10.1093/ndt/gfs460> PMID: 23129826
